# Supplementary material for: Measuring impairments of functioning and health in patients with axial spondyloarthritis by using the ASAS Health Index and the Environmental Item Set: translation and cross-cultural adaptation into 15 languages
Source: PubMed Central journal article supplement — RMD Open. 2016 Oct 4;2(2):e000311. doi: 10.1136/rmdopen-2016-000311 (PMC5051462; doi:10.1136/rmdopen-2016-000311), 2016-10-04
Supplement: rmdopen-2016-000311supp2.pdf [file rmdopen-2016-000311supp2.pdf]

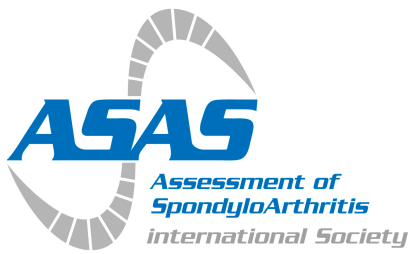

## Environmental factors related to ASAS Health Index

Date: \_\_\_\_\_

Name: \_\_\_\_\_

Please answer all statements by placing one check mark per statement to indicate which response best applies to you **at this moment in time** taking into account your rheumatic disease (the term “rheumatic disease” contains all forms of spondyloarthritis including ankylosing spondylitis).

As a result of my rheumatic disease, my family / relatives take more responsibility for household tasks.

I agree

I do not agree

I don't like the way my friends act around me.

I agree

I do not agree

I cannot count on my relatives to help me with my problems.

I agree

I do not agree

I modify my home and work environments.

I agree

I do not agree

I have difficulties getting worsening of my disease acknowledged by a health care professional.

I agree

I do not agree

Treatment of my rheumatic disease is taking up time.

I agree

I do not agree

My friends expect too much of me.

I agree

I do not agree

No one pays much attention to me at home.

I agree

I do not agree

My friends understand me.

I agree

I do not agree

**Thank you for answering this questionnaire.**
